# Supplementary material
Source: PubMed Central journal article supplement (PMC7274292)

## **Supplemental Material Table of Contents**

**Supplemental Table 1:** List of classes and medications.

**Supplemental Table 2:** Association between benzodiazepines and mortality in patients initiating hemodialysis (n=69,368) between 2013-2014 stratified by age, sex, race, and opioid co-dispensing.

**Supplemental Figure 1:** Illustration of time-varying exposure to benzodiazepine or opioid claims for one person. Several sensitivity analyses were performed wherein person-day exposure was extended to +7 days, +14 days, and +28 days beyond the outlined periods above.

**Supplemental Table 1: List of classes and medications.**

| Class                        | Medications                                                                                                                                                                                                                                                                                                                                                                                                                                                                                                                                                                                                                                                                                      |
|------------------------------|--------------------------------------------------------------------------------------------------------------------------------------------------------------------------------------------------------------------------------------------------------------------------------------------------------------------------------------------------------------------------------------------------------------------------------------------------------------------------------------------------------------------------------------------------------------------------------------------------------------------------------------------------------------------------------------------------|
| Short-acting benzodiazepines | Alprazolam, estazolam, lorazepam, midazolam, oxazepam, temazepam, and triazolam                                                                                                                                                                                                                                                                                                                                                                                                                                                                                                                                                                                                                  |
| Long-acting benzodiazepines  | chlordiazepoxide, clobazam, clonazepam, clorazepate, diazepam, flurazepam                                                                                                                                                                                                                                                                                                                                                                                                                                                                                                                                                                                                                        |
| Opioids                      | alfentanil, buprenorphine, butorphanol, codeine, dihydrocodeine, fentanyl, hydrocodone, hydromorphone, meperidine, methadone, morphine, nalbuphine, nucynta, oxycodone, oxymorphone, pentazocine, propoxyphene, remifentanil, sufentanil, tapentadol, talwin, tramadol, carfentanil, pethidine, and etorphine                                                                                                                                                                                                                                                                                                                                                                                    |
| Antidepressants              | citalopram, escitalopram, fluoxetine, fluvozamine, paroxetine, sertraline; desvenlafaxine, duloxetine, levomilnacipran, milnacipran, venlafaxine; vilazodone, vortioxetine; nefazodone, trazodone; atomoxetine, reboxetine, teniloxazine, viloxazine; bupropion; amitriptyline, amitriptyline, clomipramine, desipramine, dibenzepin, dimetacrine, dosulepin, doxepin, imipramine, lofepramine, melitracen, nitroxazepine, nortriptyline, noxiptiline, opipramol, pipofezine, protriptyline, trimipramine; amoxapine, maprotiline, mianserin, mirtazapine, setiptiline; isocarboxazid, phenelzine, tranylcpromine, selegiline, metralindole, moclobemide, pirlindole, toloxatone, and bifemelane |
| Neuropathic pain medications | nortriptyline, desipramine, amitriptyline, clomipramine, imipramine, duloxetine, venlafaxine, gabapentin, enacarbil, lidocaine, capsaicin, tramadol, morphine, oxycodone, and botulinum                                                                                                                                                                                                                                                                                                                                                                                                                                                                                                          |

Benzodiazepine doses were converted to a standard dose to calculate LME, lorazepam milligram equivalent: 0.5 for alprazolam, 10 for chlordiazepoxide, 0.25 for clonazepam, 5 for diazepam, 1 for lorazepam, 15 for oxazepam, and 10 for temazepam.

**Supplemental Table 2: Association between benzodiazepines and mortality in patients initiating hemodialysis (n=69,368) between 2013-2014 stratified by age, sex, race, and opioid co-dispensing.** Use of benzodiazepines and other medications were treated as time-varying and all models were adjusted. The results below are from three separate models; all models were adjusted for age, sex, race, prescription (antidepressant & CNS depressants), and comorbidities. CNS depressants included sedatives, muscle relaxants, and antipsychotics. Comorbidities included diabetes mellitus, cardiovascular disease, peripheral vascular disease, hypertension, COPD, smoking history, cancer, drug abuse, inability to ambulate, institutionalized, and obesity. In the short-acting benzodiazepine model, those taking long-acting benzodiazepines were treated as unexposed. Similarly, in the long-acting benzodiazepine model, those taking short-acting were treated as unexposed. LME, lorazepam milligram equivalent

| Stratification factor | Number of deaths | Any<br>aHR (95% CI) | Short-acting<br>aHR (95% CI) | Long-acting<br>aHR (95% CI) |
|-----------------------|------------------|---------------------|------------------------------|-----------------------------|
| Age                   |                  |                     |                              |                             |
| 18-64                 | 4,541            | 1.31 (1.16-1.48)    | 1.43 (1.25-1.63)             | 0.96 (0.75-1.24)            |
| 65+                   | 12,440           | 1.31 (1.21-1.42)    | 1.46 (1.34-1.58)             | 0.77 (0.62-0.95)            |
| P for interaction     |                  | 0.98                | 0.77                         | 0.19                        |
| Sex                   |                  |                     |                              |                             |
| Men                   | 9,149            | 1.48 (1.35-1.62)    | 1.62 (1.47-1.79)             | 0.99 (0.79-1.24)            |
| Women                 | 7,832            | 1.17 (1.07-1.28)    | 1.31 (1.18-1.44)             | 0.72 (0.57-0.91)            |
| P for interaction     |                  | 0.002               | 0.006                        | 0.06                        |
| Race                  |                  |                     |                              |                             |
| Nonwhite              | 4,193            | 1.41 (1.20-1.66)    | 1.45 (1.21-1.73)             | 1.19 (0.84-1.70)            |
| White                 | 12,788           | 1.29 (1.20-1.39)    | 1.45 (1.34-1.57)             | 0.78 (0.65-0.94)            |
| P for interaction     |                  | 0.32                | 0.98                         | 0.04                        |
| Opioids               |                  |                     |                              |                             |
| No                    | 5,634            | 1.22 (1.13-1.32)    | 1.34 (1.23-1.45)             | 0.83 (0.69-1.00)            |
| Yes                   | 11,347           | 1.66 (1.46-1.90)    | 1.90 (1.65-2.18)             | 0.89 (0.64-1.24)            |
| P for interaction     |                  | 0.001               | <0.001                       | 0.72                        |

**Supplemental Figure 1:** Illustration of time-varying exposure to benzodiazepine or opioid claims for one person. Several sensitivity analyses were performed wherein person-day exposure was extended to +7 days, +14 days, and +28 days beyond the outlined periods above.

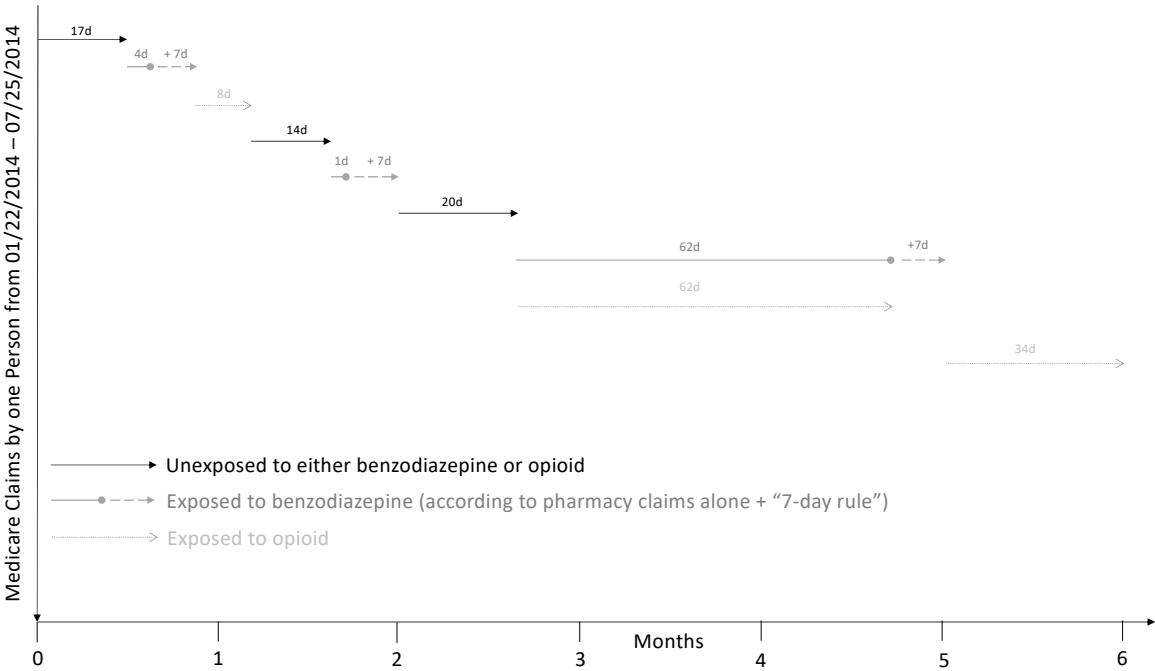

Supplement: CJN.13341019SupplementaryData.pdf [file CJN.13341019SupplementaryData.pdf]
